# Supplementary material for: Programmable DNA looping using engineered bivalent dCas9 complexes
Source: PubMed Central journal article supplement (PMC5696343; doi:10.1038/s41467-017-01873-x), 2017-11-20
Supplement: 41467_2017_1873_MOESM1_ESM.pdf [file 41467_2017_1873_MOESM1_ESM.pdf]

## A. Chromosomally integrated reporter constructs

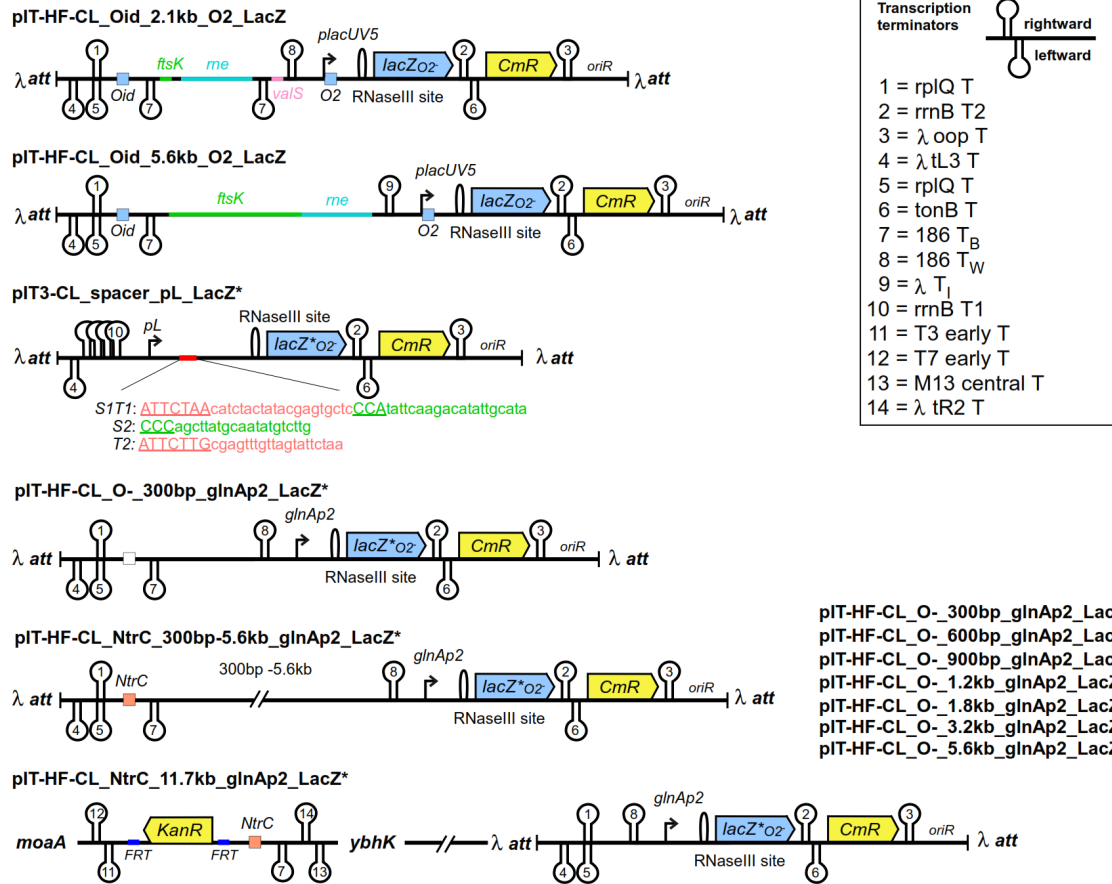

## B. Chromosomally integrated expression constructs

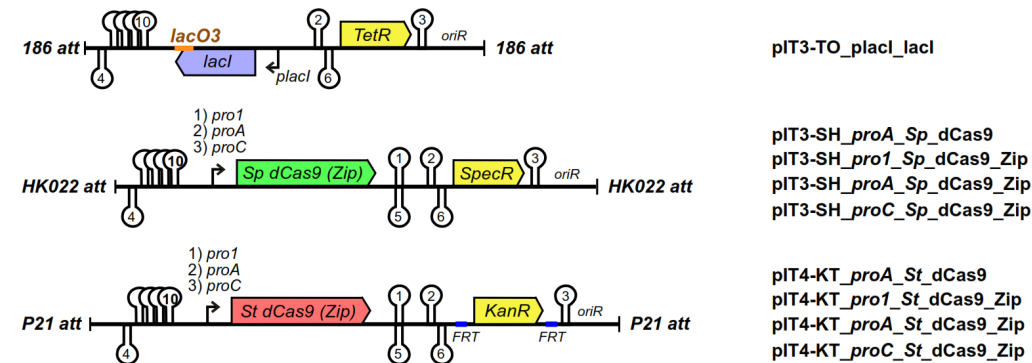

## C. Engineered gutRQ-norRVW loci

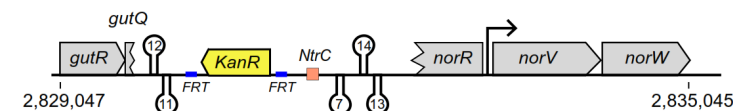

## Supplementary Figure 1. Details of chromosomally integrated constructs.

- A. LacZ reporter constructs. LacZ\* refers to *lacZ* gene with a modified (weaker) ribosome binding site. *NtrC* indicates the NtrC enhancer module (*glnA* sites 1 and 2).
- B. LacI and dCas9 expression constructs.
- C. NtrC enhancer module placed upstream of the *norRVW* locus.

### A. Plasmid based expression constructs

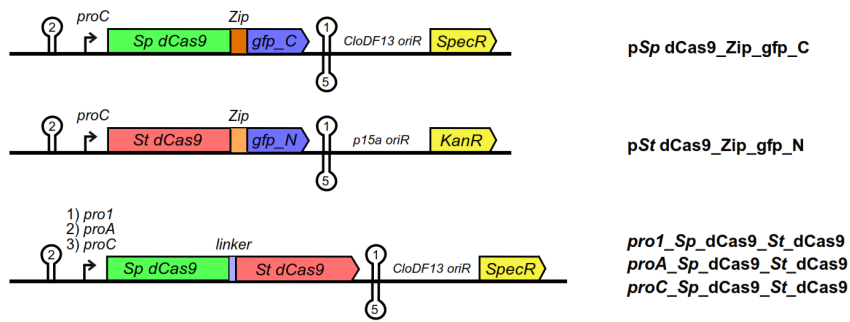

| Transcription terminators | direction |
|---------------------------|-----------|
| 1 = rplQ T                | rightward |
| 2 = rrnB T2               | rightward |
| 3 = λ oop T               | rightward |
| 4 = λ tL3 T               | rightward |
| 5 = rplQ T                | leftward  |
| 6 = tonB T                | leftward  |
| 7 = 186 T <sub>B</sub>    | leftward  |
| 8 = 186 T <sub>W</sub>    | leftward  |
| 9 = λ T <sub>I</sub>      | leftward  |
| 10 = rrnB T1              | leftward  |
| 11 = T3 early T           | leftward  |
| 12 = T7 early T           | leftward  |
| 13 = M13 central T        | leftward  |
| 14 = λ tR2 T              | leftward  |

### B. sgRNA expression plasmids

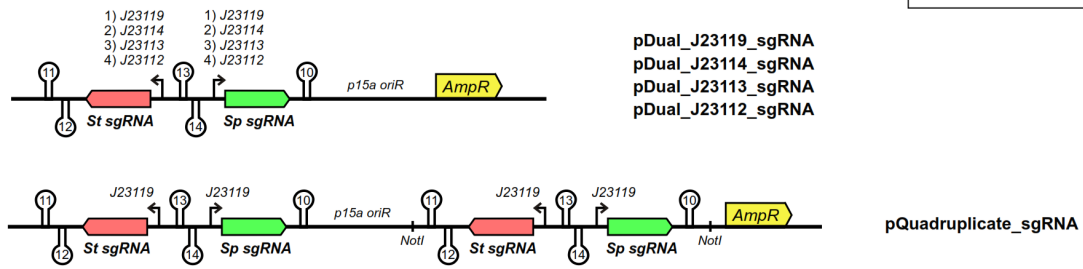

## Supplementary Figure 2. Details of plasmid based expression constructs.

- A. dCas9 expression plasmids.
- B. Guide RNA expression constructs.

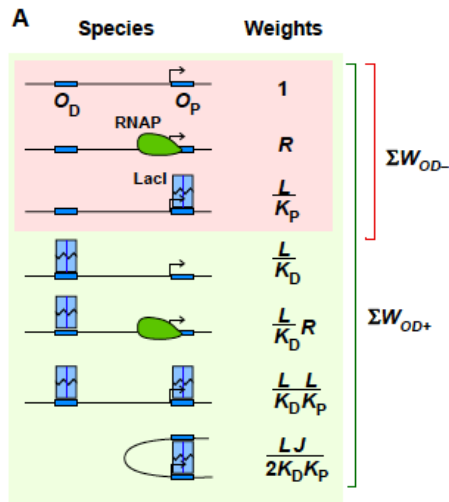

$L = [\text{LacI}]$  (nM)

$R =$  weight for RNAP occupation (unitless)

$K_P =$  dissociation constant for Lacl at  $O_P$  (nM)

$K_D =$  dissociation constant for Lacl at  $O_D$  (nM)

$J =$  DNA looping factor (nM)

Fraction looped (OD+):  $F = \frac{LJ/2K_D K_P}{\Sigma W_{OD+}}$

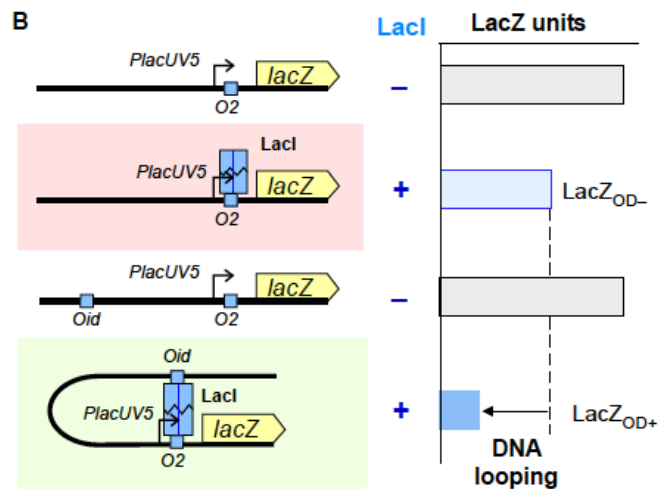

LacZ units in absence or presence of  $O_D$ :

$$\text{LacZ}_{OD-} = a \left( \frac{R}{\Sigma W_{OD-}} \right) - bkgd$$

$$\text{LacZ}_{OD+} = a \left( \frac{R+RL/K_D}{\Sigma W_{OD+}} \right) - bkgd$$

$a =$  factor relating promoter occupation by RNAP to LacZ units

$bkgd =$  unrepressible background LacZ units

**C**

$$\frac{(\text{LacZ}_{OD-} - bkgd) - (\text{LacZ}_{OD+} - bkgd)}{(\text{LacZ}_{OD-} - bkgd)} = \frac{\frac{R}{\Sigma W_{OD-}} - \frac{R+RL/K_D}{\Sigma W_{OD+}}}{\frac{R}{\Sigma W_{OD-}}} = 1 - \frac{(1+L/K_D)\Sigma W_{OD-}}{\Sigma W_{OD+}}$$

$$= 1 - \frac{(1+L/K_D)(1+R+L/K_P)}{\Sigma W_{OD+}} = 1 - \frac{1+R+L/K_P+L/K_D+RL/K_D+L^2/K_P K_D}{\Sigma W_{OD+}} = \frac{LJ/2K_P K_D}{\Sigma W_{OD+}} = F$$

**D**

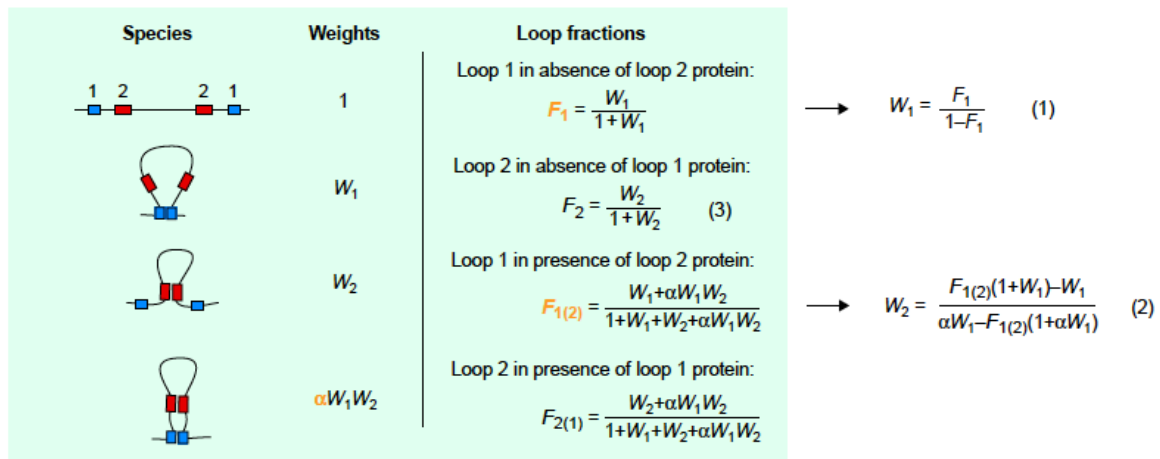

### Supplementary Figure 3. Loop modelling.

A. Statistical-mechanical model for LacI repression with two operators and DNA looping <sup>1</sup>.

Shaded boxes indicate species available in the absence or presence of the distal operator.

B. LacI-mediated DNA looping in the presence of the distal operator can improve repression of the promoter. Just one of the species available in each condition is shown (see A). The equations show how the observed LacZ units can be related to the model parameters in A.

C. Interconversion of the observed LacZ units  $\pm$  OD and the fractional looping,  $F$ , using equations from A and B.

D. A statistical-mechanical two-loop model <sup>2</sup> allows calculation of internal loop formation from:

(1) measurement of the fractional looping of the external loop in the absence of the internal loop,  $F_1$  (measured for the LacI loop without dCas9); (2) measurement of the fractional looping of the external loop in the presence of the internal loop,  $F_{1(2)}$  (measured for the LacI loop with dCas9); and (3) the loop assistance factor,  $\alpha$ , which quantitates how much the formation of one loop favours the formation of the other. For a 2.1 kb LacI loop with a 1.4 kb internal loop formed by  $\lambda$  CI, this assistance factor was  $\sim 3^2$ , roughly equivalent to the fractional change in the effective length of DNA looped by LacI in the absence of CI looping (2.1 kb) compared to in its presence (2.1-1.4 = 0.7 kb). Thus, we expect  $\alpha \sim 2100 \text{ bp}/(300 \text{ bp}+390 \text{ bp}) \sim 3$  for the reporters in Figure 4B, and  $\alpha = 5600 \text{ bp}/(300 \text{ bp}+590 \text{ bp}) \sim 6.2$  for the reporters in Figure 5A.  $F_1$  allows calculation of  $W_1$  (eqn 1). This and the other values allows calculation of  $W_2$  (eqn 2).  $F_2$ , the fractional looping of the internal (dCas9) loop in the absence of the external (LacI) loop can be calculated from  $W_2$  (eqn 3).

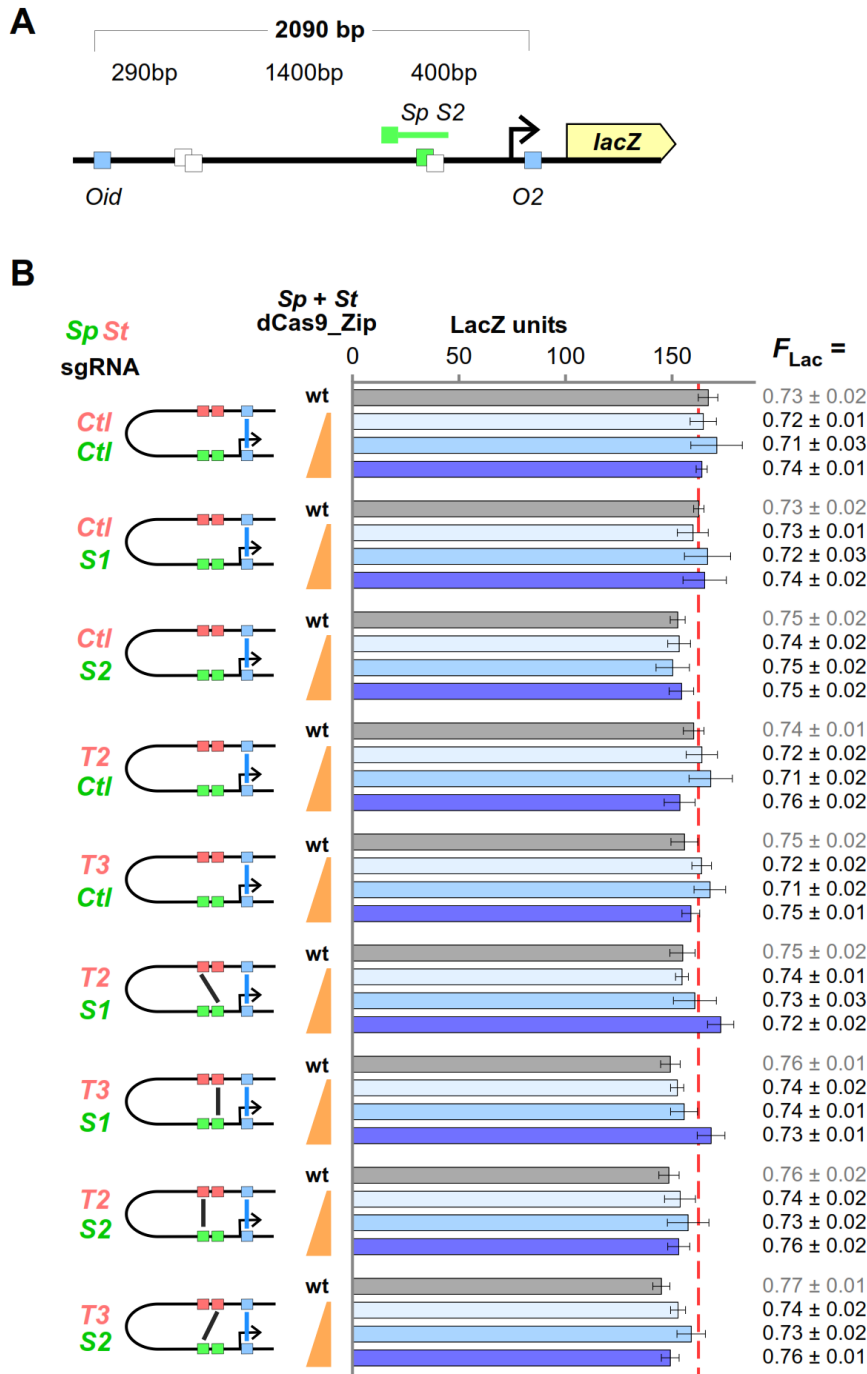

**Supplementary Figure 4. Binding of bivalent dCas9 to its target DNA is required for dCas9 mediated DNA looping.**

A. Schematic representation of the 1.2 kb looping reporter with all but one dCas9 target site removed.

B. Lack of DNA looping by bivalent dCas9s in the absence of specific dCas9 target sites. Data are mean  $\pm$  95% confidence intervals ( $n = 9$ ).  $F_{loop}$  is calculated as  $[(LacZ_{OD-} - bkgd) - (LacZ_{OD+} - bkgd)] / (LacZ_{OD-} - bkgd)$  (Supplementary Figures 3A-C), and is expressed as mean  $\pm$  standard deviation ( $n = 9$ ).

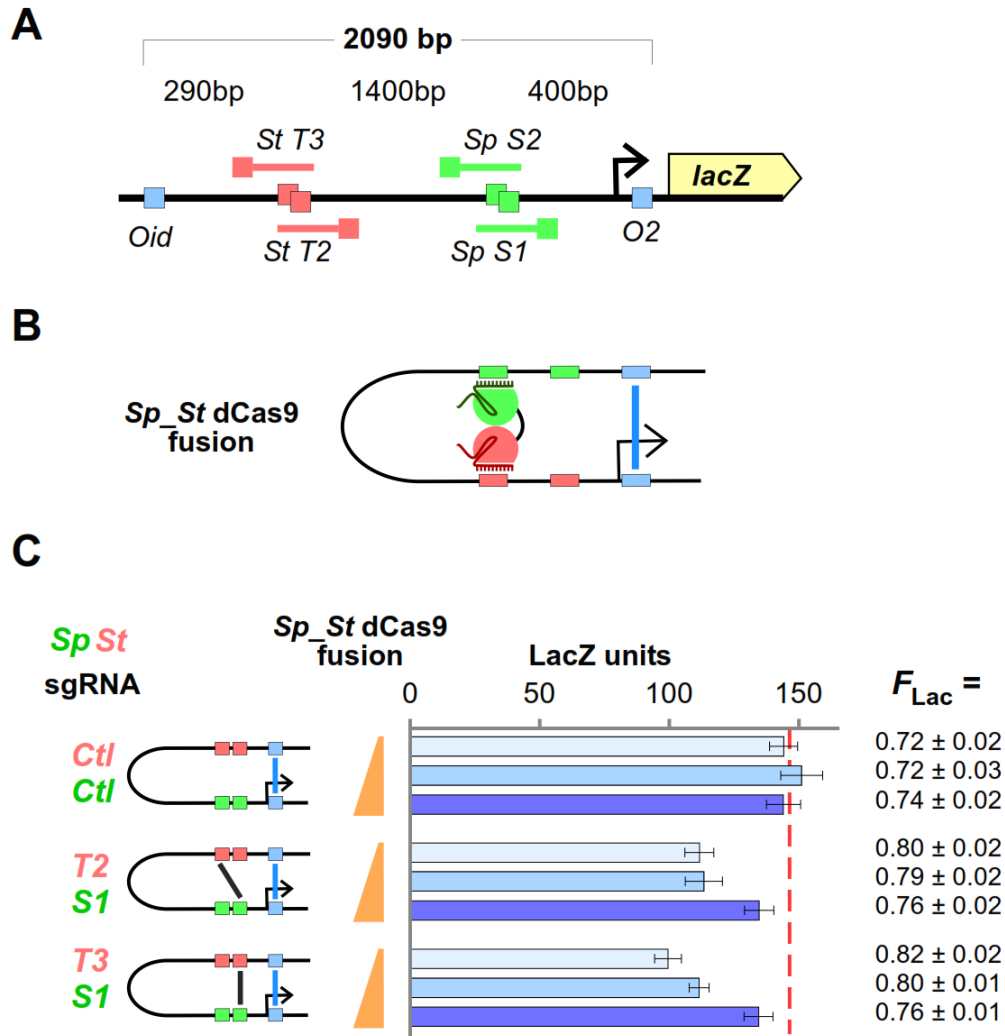

**Supplementary Figure 5. DNA looping via *Sp\_St*\_dCas9 fusion.**

A. Schematic representation of the 1.2 kb looping reporter (see also Supplementary Figure 1).

B. A cartoon representation of a nested loop formed by the *Sp\_St*\_dCas9 fusion complex and the Lac repressor.

C. The formation of CRISPR loop via *Sp\_St*\_dCas9 fusion assists the formation of the LacI looping. Data are mean  $\pm$  95% confidence interval ( $n = 9$ ).  $F_{loop}$  values are mean  $\pm$  standard deviation ( $n = 9$ ).

**Supplemental Table 1. List of spacer sequences used in this study.**

|                          | Spacer sequences (5' to 3') |
|--------------------------|-----------------------------|
| <i>Sp (St) Ctl</i> sgRNA | AACTTTCAGTTTAGCGGTCT        |
|                          |                             |
| <i>Sp</i> sgRNA S1       | TATGCAATATGTCTTGAATA        |
| <i>Sp</i> sgRNA S2       | CAAGACATATTGCATAAGCT        |
| <i>Sp</i> sgRNA S3       | ATTCGCGGTTTTTCGACTTCC       |
| <i>Sp</i> sgRNA S4       | GGGTTTCAGTTAGTCACCTGC       |
| <i>Sp</i> sgRNA S5       | TCCCTCTCAAGCCGCCAGCA        |
| <i>Sp</i> sgRNA S6       | TCTGAGACGTGATGGTGGCG        |
| <i>Sp</i> sgRNA S7       | ACCATTCCCGTCATTATTGT        |
| <i>Sp</i> sgRNA S8       | TTGCTGAAAAACTCGGCGGC        |
|                          |                             |
| <i>St</i> sgRNA T1       | GAGCACTCGTATAGTAGATG        |
| <i>St</i> sgRNA T2       | TTAGAATACTAACAAACTCG        |
| <i>St</i> sgRNA T3       | ATTCTAACATCTACTAGAAT        |
| <i>St</i> sgRNA T4       | GTTTAAGGTCCCGTGACAAG        |
| <i>St</i> sgRNA T5       | CGGTAGTCGCACCGGTGGTT        |
| <i>St</i> sgRNA T6       | CTGAAGGCAGCGATAATCGC        |
| <i>St</i> sgRNA T7       | CTGATTGAACAACCTGGAAG        |

**Supplemental Table 2. List of primers used in chromosome conformation capture assays.**

| Primer Name | Primer sequence              |
|-------------|------------------------------|
| <i>P1</i>   | 5' TGCTCGTAACGCACTTTCTG 3'   |
| <i>P2</i>   | 5' GCAGATACACTTGCTGATGCG 3'  |
| <i>P3</i>   | 5' GGACAAACTCAAGGTCATTCGC 3' |
| <i>P4</i>   | 5' ACGTTAGATACCCAGCTTATGC 3' |
| <i>P5</i>   | 5' CCGAAATGGTTGCCGATGTG 3'   |



**Supplemental Table 3. List of primers used in qRT-PCR experiments.**

| Target Name    | Primer sequence             | Primer Efficiency | Amplicon size |
|----------------|-----------------------------|-------------------|---------------|
| <i>Sp Cas9</i> | 5' ATGGAGAGATTCGCAAACGC 3'  | 94.8%             | 94bp          |
|                | 5' TTGCGCACTGTGGCAAATC 3'   |                   |               |
| <i>St Cas9</i> | 5' ACATCCGCAAGTACAGCAAG 3'  | 93.8%             | 118bp         |
|                | 5' ACCACCTTGTTGTTGCTGTC 3'  |                   |               |
| <i>norV</i>    | 5' TGGCACAAATTCCTGATACG 3'  | 94.6%             | 143bp         |
|                | 5' AATGAGCTGTTTGCCGTTGC 3'  |                   |               |
| <i>norW</i>    | 5' TGCACCTGTTTCCACAAACC 3'  | 100.2%            | 91bp          |
|                | 5' AGCTTGTCGTATTGCCACTG 3'  |                   |               |
| <i>gyrA</i>    | 5' TGGAAGTTGACGCCAAAACC 3'  | 94.9%             | 124bp         |
|                | 5' ATGCCTTCCACGCGTTTTTC 3'  |                   |               |
| <i>rho</i>     | 5' AAATCCGCCGTTTCAACCTC 3'  | 89.7%             | 137bp         |
|                | 5' TTTGTTGCGGGCGTTTTTCAG 3' |                   |               |

## Supplementary References

1. Priest DG, Cui L, Kumar S, Dunlap DD, Dodd IB, Shearwin KE. Quantitation of the DNA tethering effect in long-range DNA looping in vivo and in vitro using the Lac and lambda repressors. *Proc Natl Acad Sci U S A* **111**, 349-354 (2014).
2. Priest DG, Kumar S, Yan Y, Dunlap DD, Dodd IB, Shearwin KE. Quantitation of interactions between two DNA loops demonstrates loop domain insulation in E. coli cells. *Proc Natl Acad Sci U S A* **111**, E4449-4457 (2014).
